# Supplementary material for: Hierarchically porous zeolitic imidazole framework-8/cellulose membrane installed in filter as sorbent for microextraction in packed syringe towards trace tetracyclines in water samples
Source: Royal Society of Chemistry journal article supplement (doi:10.1039/d2nj05130c), 2022-12-30
Supplement: d2nj05130c1.pdf [file d2nj05130c1.pdf]

# New Journal of Chemistry

## Electronic Supplementary Information

**Hierarchically porous zeolitic imidazole framework-8/cellulose membrane installed in filter as sorbent for microextraction in packed syringe towards trace tetracyclines in water samples**

Lin Li<sup>1</sup> · Sijia Zhang<sup>2</sup> · YingyingLi<sup>1</sup> · Ting Wang<sup>2</sup> · Xiaohong Hou<sup>2\*</sup>

<sup>1</sup> *School of Pharmacy, Shenyang Pharmaceutical University, Shenyang 110016, Liaoning Province, People's Republic of China.*

<sup>2</sup> *School of Pharmaceutical Engineering, Shenyang Pharmaceutical University, Shenyang 110016, Liaoning Province, People's Republic of China.*

---

\*Corresponding author. Tel: +86-024-43520212; Fax: +86-024-43520212.

E-mail address: [syphu\\_houxiaohong@163.com](mailto:syphu_houxiaohong@163.com)

## Content list

1. Chemical properties and structures of target TCs (Table S1), Page 1.
2. Reagents and materials, Page 2.
3. Instrumentation and analytical conditions, Page 3.
4. The schematic diagram of ZIF-8/CM synthesis procedure (Fig. S1), Page 4.
5. The schematic diagram of MEPS device and procedure (Fig. S2), Page 5.
6. TGA curves and the determination of ZIF-8 content in ZIF-8/CM (Fig. S3, Table S2), Page 6.
7. Recovery results of four original samples (Table S3), Page 7.
8. Analytical results of original samples (Table S4), Page 8.
9. References, Page 9.

## 1. Chemical properties and structures of target TCs

**Table S1** Chemical properties and structures of target TCs

| Analyte               | Molecular formula    | Molecular mass | Chemical structure                                                                  | $pK_a^{1-2}$  |
|-----------------------|----------------------|----------------|-------------------------------------------------------------------------------------|---------------|
| Oxytetracycline (OTC) | $C_{22}H_{24}N_2O_9$ | 460.43         | 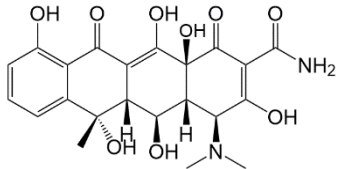  | 3.3, 7.3, 9.1 |
| Tetracycline (TC)     | $C_{22}H_{24}N_2O_8$ | 444.43         |   | 3.3, 7.7, 9.3 |
| Doxycycline (DC)      | $C_{22}H_{24}N_2O_8$ | 444.43         |  | 3.5, 7.7, 9.5 |

---

## 2. Reagents and materials

Zinc nitrate hexahydrate ( $\text{Zn}(\text{NO}_3)_2 \cdot 6\text{H}_2\text{O}$ ) and 2-methylimidazole were obtained from Aladdin Industrial Corporation (Shanghai, China). Methanol and acetonitrile were acquired from Yuwang Group (Shandong, China). Cotton linter was provided by Hubei Chemical Fiber Group (Wuhan, China). Ultrapure water was produced by SZ-93A auto Redistilled water system (Shanghai, China). All other reagents and chemicals used in the experiments were from Damao Chemical Reagent Factory (Tianjin, China).

---

### 3. Instrumentation and analytical conditions

Chromatographic separation and determination of TCs were achieved on a Shimadzu LC-20 AT liquid chromatography tandem SPD-20A ultraviolet detector (Shimadzu, Japan) with a Diamonsil C18 analytical column (250 mm×4.6 mm, i.d. 5 μm) (Dikma, China). The mobile phase was constituted of 0.02 mol L<sup>-1</sup> oxalic acid aqueous solution and acetonitrile (73:27, v/v). The detection wavelength was 360 nm. The flow rate was 1 mL min<sup>-1</sup>. The column temperature was maintained at 30°C and the injection volume was 20 μL.

Other main equipment used are as follows: X-ray diffraction (XRD) measurements were performed with a D8 ADVANCE diffractometer (Bruker, Germany). The morphology of CM and ZIF-8/CM was observed by Gemini SEM 300 scanning electron microscopy (SEM) (ZEISS, Germany). Thermal gravimetric analysis (TGA) was tested by thermal gravimetric analyser (METTLER TOLEDO, America) with a heating rate of 10°C min<sup>-1</sup> from 30 to 700°C under nitrogen atmosphere. The nitrogen physisorption isotherms were carried out with a SA-3100 surface area and pore analyzer instrument (Bekman Coulter, USA).

#### 4. The schematic diagram of ZIF-8/CM synthesis procedure

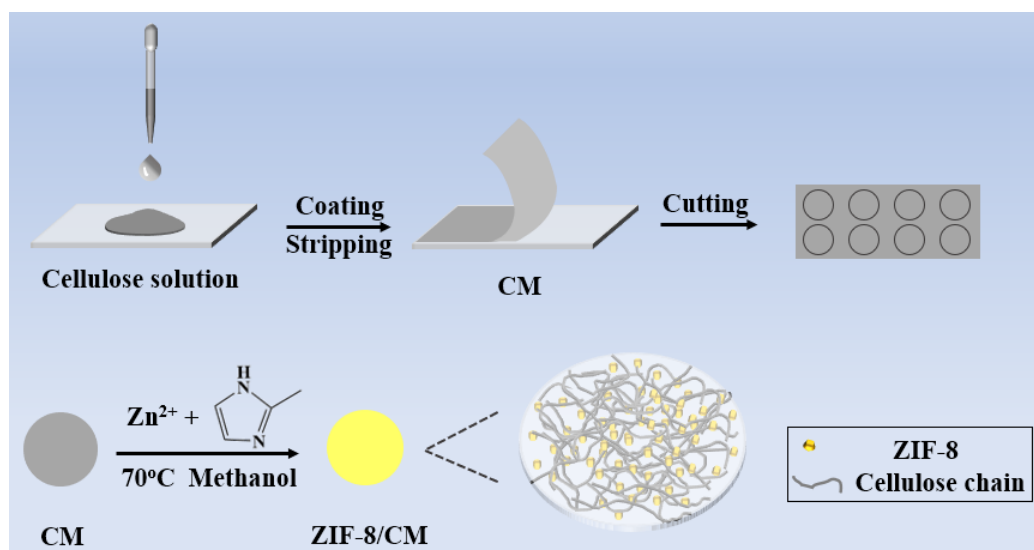

**Fig. S1** Schematic diagram of ZIF-8/CM synthesis procedure

## 5. The schematic diagram of MEPS device and procedure

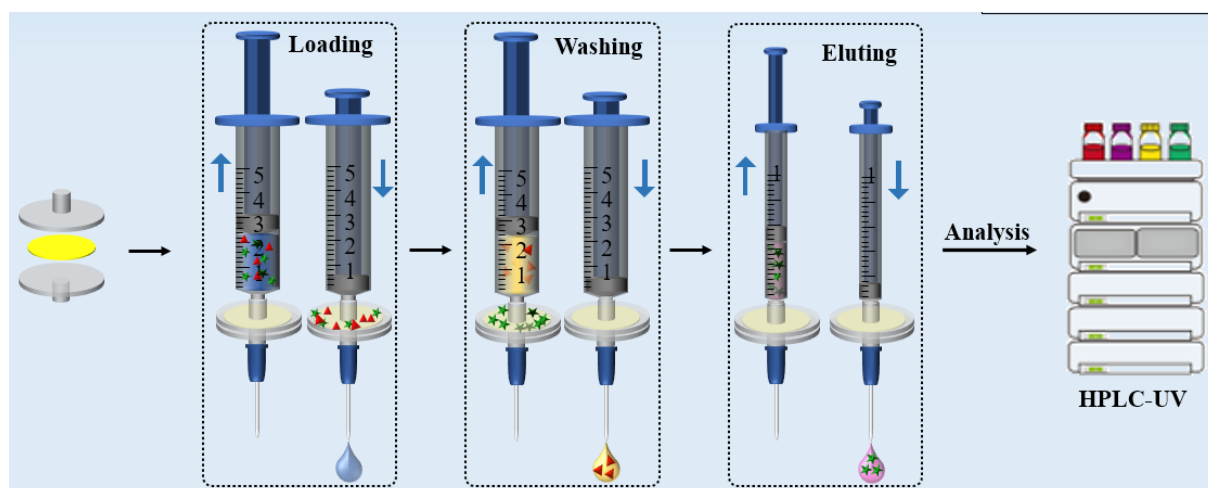

**Fig. S2** Schematic diagram of MEPS device and procedure

## 6. TGA curves and the determination of ZIF-8 content in ZIF-8/CM

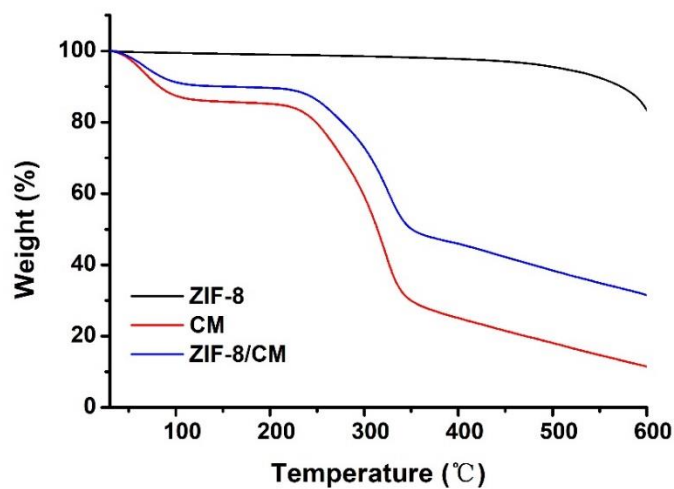

**Fig. S3** TGA curves for ZIF-8, CM and ZIF-8/CM

$$\text{Measured content (\%)} = \frac{\text{ash content}_{\text{ZIF-8/CM}} - \text{ash content}_{\text{CM}}}{\text{ash content}_{\text{ZIF-8}} - \text{ash content}_{\text{CM}}} \times 100$$

where  $\text{ash content}_{\text{ZIF-8/CM}}$  is the ash content of ZIF-8/CM,  $\text{ash content}_{\text{CM}}$  is the ash content of CM and  $\text{ash content}_{\text{ZIF-8}}$  is the ash content of ZIF-8.

**Table S2** Measured content of ZIF-8 in the ZIF-8/CM

|          | Ash content | Measured content |
|----------|-------------|------------------|
| ZIF-8    | 83.46%      |                  |
| CM       | 11.46%      | 27.86%           |
| ZIF-8/CM | 31.52%      |                  |



## 7. Recovery results of four original samples

**Table S3** Recovery of three TCs in different water samples (n = 3)

| Sample        | Spiked level        | OTC          |         | TC           |         | DC           |         |
|---------------|---------------------|--------------|---------|--------------|---------|--------------|---------|
|               |                     | Recovery (%) | RSD (%) | Recovery (%) | RSD (%) | Recovery (%) | RSD (%) |
| Bottle water  | Low <sup>a</sup>    | 75.3         | 4.7     | 77.9         | 5.1     | 81.0         | 8.7     |
|               | Middle <sup>b</sup> | 79.4         | 5.9     | 86.1         | 3.9     | 85.8         | 4.5     |
|               | High <sup>c</sup>   | 87.4         | 2.9     | 85.3         | 2.8     | 91.0         | 3.8     |
| Tap water     | Low                 | 82.1         | 8.4     | 73.2         | 4.8     | 84.3         | 9.2     |
|               | Middle              | 88.9         | 7.2     | 95.2         | 7.8     | 77.6         | 8.9     |
|               | High                | 96.4         | 5.8     | 87.1         | 6.5     | 82.4         | 4.2     |
| River water 1 | Low                 | 77.5         | 4.7     | 72.9         | 6.6     | 75.8         | 7.8     |
|               | Middle              | 88.3         | 3.9     | 95.8         | 2.9     | 81.4         | 5.3     |
|               | High                | 91.5         | 2.4     | 93.4         | 3.4     | 83.7         | 3.5     |
| River water 2 | Low                 | 84.2         | 4.7     | 77.8         | 7.1     | 83.1         | 5.4     |
|               | Middle              | 90.4         | 8.1     | 87.3         | 4.7     | 84.1         | 8.3     |
|               | High                | 97.6         | 3.8     | 89.9         | 4.5     | 83.3         | 4.4     |

<sup>a</sup>2 µg L<sup>-1</sup> OTC, 4 µg L<sup>-1</sup> TC and 12.5 µg L<sup>-1</sup> DC

<sup>b</sup>20 µg L<sup>-1</sup> OTC, 40 µg L<sup>-1</sup> TC and 125 µg L<sup>-1</sup> DC

<sup>c</sup>32 µg L<sup>-1</sup> OTC, 64 µg L<sup>-1</sup> TC and 200 µg L<sup>-1</sup> DC

---

## 8. Analytical results of original samples

**Table S4** Analytical results of original samples

| Sample        | Concentration ( $\mu\text{g L}^{-1}$ ) (n=3) |    |    |
|---------------|----------------------------------------------|----|----|
|               | OTC                                          | TC | DC |
| Bottle water  | ND <sup>d</sup>                              | ND | ND |
| Tap water     | ND                                           | ND | ND |
| River water 1 | ND                                           | ND | ND |
| River water 2 | < LOQ                                        | ND | ND |

<sup>d</sup> Not detected

---

## 9. References

- 1 A. Y. Udalova, S. G. Dmitrienko, S. V. Natchukc, V. V. Apyari and Y. A. Zolotov, *J. Anal. Chem.*, 2015, **70**, 292-297.
- 2 R. L. Wang, C. Li, Q. L. Li, Q. L. Li, S. X. Zhang, F. Lv and Z. M. Yan, *J. Chromatogr. A*, 2020, **1622**, 461098.
